# Supplementary material for: Frailty Risk Prediction Model among Older Adults: A Chinese Nation-Wide Cross-Sectional Study
Source: MDPI journal article supplement (doi:10.3390/ijerph19148410), 2022-07-09
Supplement: s1 [file s1]

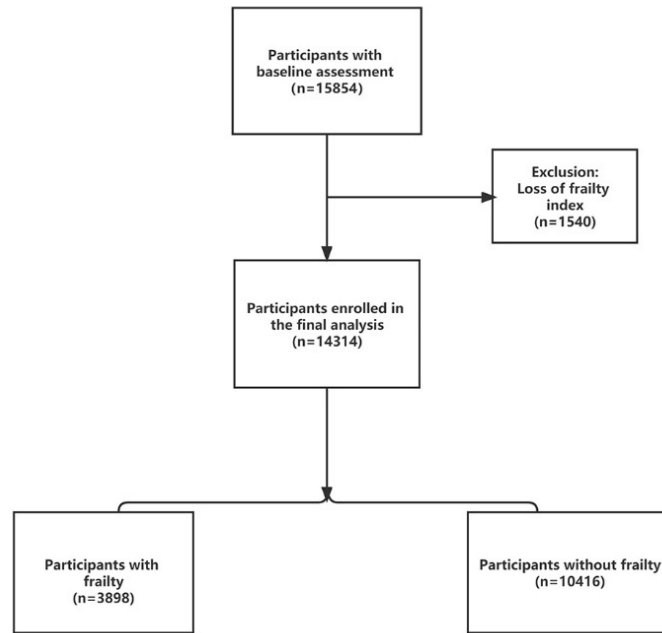

**Supplemental Figure S1. The flow chart of participants.**

**Supplemental Table S1. Detailed information on behavioural and social support factors.**

| Characteristics               | Description                      |
|-------------------------------|----------------------------------|
| Behavioral Factors (n=35)     |                                  |
| Co-residence                  | 1.With household member(s)       |
|                               | 2.Alone                          |
|                               | 3.In an institution              |
| Staple food                   | 1.Rice                           |
|                               | 2.Corn (maize)                   |
|                               | 3.Wheat (noodles and bread etc.) |
|                               | 4.Half rice and half flour       |
|                               | 5.Others                         |
| Amount of staple food per day | 1.<0.2                           |
|                               | 2.0.2-0.5                        |
|                               | 3.>0.5                           |
| Edible oil                    | 1.Other vegetable oils           |
|                               | 2.Gingili grease                 |
|                               | 3.Lard                           |
|                               | 4.Other animal's fat             |
| Main dietary flavour          | 1.Insipidity                     |
|                               | 2.Salty                          |
|                               | 3.Sweet                          |
|                               | 4.Hot                            |
|                               | 5.Crude                          |
|                               | 6.Others                         |
| Drinking water                | 1.From a well                    |

| Characteristics                                                                                                                                                                                                                                                                                                  | Description                                                                       |
|------------------------------------------------------------------------------------------------------------------------------------------------------------------------------------------------------------------------------------------------------------------------------------------------------------------|-----------------------------------------------------------------------------------|
|                                                                                                                                                                                                                                                                                                                  | 2.From a river or lake<br>3.From a spring<br>4.From a pond or pool<br>5.Tap water |
| Smoking                                                                                                                                                                                                                                                                                                          |                                                                                   |
| Drinking                                                                                                                                                                                                                                                                                                         | 1.Yes<br>2.No                                                                     |
| Exercise                                                                                                                                                                                                                                                                                                         |                                                                                   |
| Having taken a nutrient supplement/ medicine in the past 24 hours                                                                                                                                                                                                                                                |                                                                                   |
| Times of brushing teeth                                                                                                                                                                                                                                                                                          | 1.Do not brush<br>2.Occasionally<br>3.Once<br>4.Twice<br>5.Three or more times    |
| Frequency of eating fresh fruit/ vegetable/ meat/ fish/ egg/ legume/ food/ pickle/ sugar/ garlic/ dairy/ nut/ mushroom or algae/ vitamin/ medicinal plant/ tea                                                                                                                                                   | 1.Almost every day<br>2.Occasionally<br>3.Rarely or never                         |
| Taking protein/ calcium/ iron/ zinc/ compound vitamin/ vitamin A or D/ DHA/ others usually                                                                                                                                                                                                                       | 1.Yes<br>2.No                                                                     |
| Social support factors (n=25)                                                                                                                                                                                                                                                                                    |                                                                                   |
| Number of children                                                                                                                                                                                                                                                                                               | 1.0<br>2.1<br>3.2-4<br>4.5-7<br>5.≥8                                              |
| The first person you want to share thoughts with                                                                                                                                                                                                                                                                 | 1.Spouse                                                                          |
| The first person you ask for help when you have problems                                                                                                                                                                                                                                                         | 2.Children, sons in law or daughters in law                                       |
| Primary caregiver when ill                                                                                                                                                                                                                                                                                       | 3.Others<br>4.Nobody                                                              |
| Primary payer of medical expenses                                                                                                                                                                                                                                                                                |                                                                                   |
| Distance from home to the nearest hospital (in kilometers)                                                                                                                                                                                                                                                       | 1.≤1<br>2.1-2<br>3.2-10<br>4.>10                                                  |
| Able to get adequate medical service                                                                                                                                                                                                                                                                             |                                                                                   |
| Regular physical examination once every year                                                                                                                                                                                                                                                                     |                                                                                   |
| Having any social security and social insurance (retirement pension/ public old-age insurance/ private or commercial old-age insurance/ public free medical services/ urban employee medical insurance/ urban resident medical insurance/ new rural cooperative medical insurance/ commercial medical insurance) | 1.Yes<br>2.No                                                                     |
| Having available community service (personal care/ home visit/ spiritual comfort                                                                                                                                                                                                                                 |                                                                                   |

| Characteristics                                                                                                          | Description |
|--------------------------------------------------------------------------------------------------------------------------|-------------|
| and chat/ daily shopping/ social and recreational activity/ legal aid/ health education/ neighborhood-relation/ others). |             |

**Supplemental Table S2. The points for characteristics.**

| Characteristics                           | Values | Points | Characteristics                | Values | Points |
|-------------------------------------------|--------|--------|--------------------------------|--------|--------|
| Age (year)                                |        |        | Frequency of taking vegetables |        |        |
| 50-69                                     | 0      | 0      | Almost everyday                | 0      | 0      |
| 70-99                                     | 1      | 49     | Occasionally                   | 1      | 9      |
| ≥100                                      | 2      | 99     | Rarely or never                | 2      | 37     |
| Nationality                               |        |        | Frequency of taking egg        |        |        |
| Han                                       | 0      | 15     | Almost everyday                | 0      | 7      |
| Minority                                  | 1      | 0      | Occasionally                   | 1      | 0      |
| Residence                                 |        |        | Rarely or never                | 2      | 12     |
| Urban                                     | 0      | 6      | Frequency of taking garlic     |        |        |
| Rural                                     | 1      | 0      | Almost everyday                | 0      | 0      |
| Education (year)                          |        |        | Occasionally                   | 1      | 1      |
| 0                                         | 0      | 18     | Rarely or never                | 2      | 10     |
| 1-6                                       | 1      | 11     | Frequency of taking dairy      |        |        |
| >6                                        | 2      | 0      | Almost everyday                | 0      | 21     |
| Marital status                            |        |        | Occasionally                   | 1      | 5      |
| Currently married and living with spouse  | 0      | 6      | Rarely or never                | 2      | 0      |
| Separated                                 | 1      | 18     | Frequency of taking nut        |        |        |
| Divorced                                  | 2      | 17     | Almost everyday                | 0      | 0      |
| Widowed                                   | 3      | 18     | Occasionally                   | 1      | 4      |
| Never married                             | 4      | 0      | Rarely or never                | 2      | 20     |
| Main occupation before age 60             |        |        | Frequency of taking tea        |        |        |
| Professionals and technician              | 0      | 29     | Almost everyday                | 0      | 0      |
| Administrative manager                    | 1      | 34     | Occasionally                   | 1      | 5      |
| Clerk                                     | 2      | 12     | Rarely or never                | 2      | 11     |
| Self-employed                             | 3      | 7      | Main source of water           |        |        |
| Agriculture, husbandry, fishery           | 4      | 0      | From a well                    | 0      | 12     |
| House worker                              | 5      | 13     | From a river or lake           | 1      | 19     |
| Soldier                                   | 6      | 38     | From a spring                  | 2      | 12     |
| Never worked                              | 7      | 15     | From a pond or pool            | 3      | 0      |
| Others                                    | 8      | 5      | Tap water                      | 4      | 21     |
| Main source of financial support          |        |        | Current smoking                |        |        |
| Retirement wages                          | 0      | 100    | Yes                            | 0      | 0      |
| Relative (s)                              | 1      | 90     | No                             | 1      | 24     |
| Local government or community             | 2      | 85     | Current drinking               |        |        |
| Work by self                              | 3      | 0      | Yes                            | 0      | 0      |
| Self-assessed sufficient economic support |        |        | No                             | 1      | 20     |
| Yes                                       | 0      | 0      | Current exercise               |        |        |

| Characteristics                    | Values | Points | Characteristics                              | Values | Points |
|------------------------------------|--------|--------|----------------------------------------------|--------|--------|
| No                                 | 1      | 16     | Yes                                          | 0      | 0      |
| Self-rated economic level          |        |        | No                                           | 1      | 64     |
| Very rich                          | 0      | 6      | Times of brushing teeth everyday             |        |        |
| Rich                               | 1      | 0      | Do not brush                                 | 0      | 43     |
| So so                              | 2      | 10     | Occasionally                                 | 1      | 29     |
| Poor                               | 3      | 31     | Once                                         | 2      | 14     |
| Very poor                          | 4      | 44     | Twice                                        | 3      | 0      |
| Co-residence                       |        |        | Three or more times                          | 4      | 15     |
| With household member (s)          | 0      | 43     | Regular physical examination once a year     |        |        |
| Alone                              | 1      | 0      | Yes                                          | 0      | 0      |
| In an institution                  | 2      | 83     | No                                           | 1      | 25     |
| Staple food                        |        |        | First person you want to share thoughts with |        |        |
| Rice                               | 0      | 0      | Spouse                                       | 0      | 0      |
| Corn (maize)                       | 1      | 22     | Children, sons in law or daughters in law    | 1      | 22     |
| Wheat (noodles and bread etc.)     | 2      | 12     | Others                                       | 2      | 18     |
| Half rice and half flour           | 3      | 17     | Nobody                                       | 3      | 29     |
| Others                             |        | 25     | Primary caregiver when ill                   |        |        |
| Amount of staple food per day (kg) |        |        | Spouse                                       | 0      | 61     |
| <0.2                               | 0      | 23     | Children, sons in law or daughters in law    | 1      | 68     |
| 0.2-0.5                            | 1      | 6      | Others                                       | 2      | 80     |
| >0.5                               | 2      | 0      | Nobody                                       | 3      | 0      |
| Edible oil                         |        |        | Primary payer of medical expenses            |        |        |
| Other vegetable oils               | 0      | 15     | Urban employee/ resident medical insurance   | 0      | 22     |
| Gingili grease                     | 1      | 20     | Cooperative medical scheme                   | 1      | 12     |
| Lard                               | 2      | 5      | Private medical insurance                    | 2      | 6      |
| Other animal's fat                 | 3      | 0      | Self                                         | 3      | 6      |
| Main dietary flavor                |        |        | Spouse                                       | 4      | 29     |
| Insipidity                         | 0      | 18     | Children                                     | 5      | 26     |
| Salty                              | 1      | 16     | No money to pay                              | 6      | 0      |
| Sweet                              | 2      | 21     | Others                                       | 7      | 28     |
| Hot                                | 3      | 0      | Get adequate medical service                 |        |        |
| Crude                              | 4      | 35     | Yes                                          | 0      | 0      |
| Others                             | 5      | 22     | No                                           | 1      | 16     |
